# Supplementary material
Source: publisher figshare collection journal article supplement (https://diabetesjournals.figshare.com/articles/dataset/_/20301321)
Supplement: Supplementary file 1 [file 2]

Suppl. Fig 1.

A

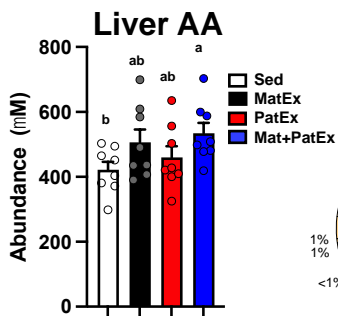

B

Liver AA

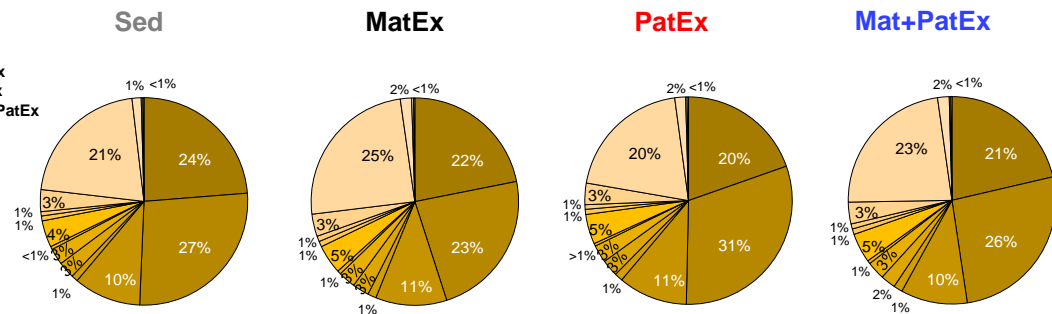

Muscle AA

Muscle AA

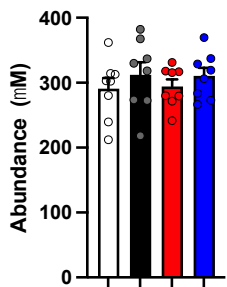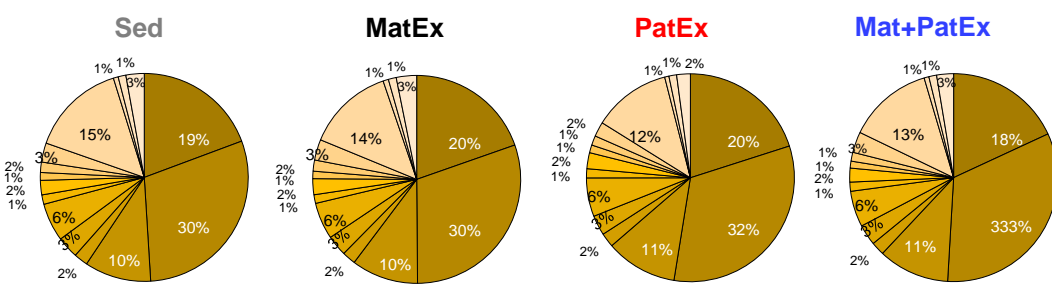

Serum AA

Serum AA

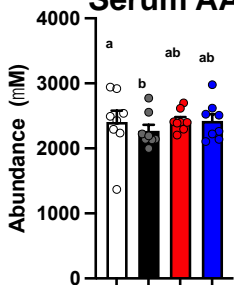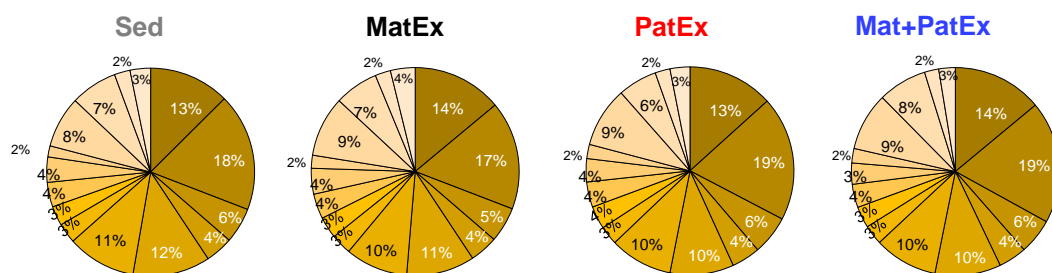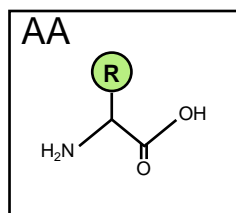

- |       |           |       |
|-------|-----------|-------|
| ■ Gly | ■ Leu/Ile | ■ Asx |
| ■ Ala | ■ Met     | ■ Glx |
| ■ Ser | ■ His     | ■ Orn |
| ■ Pro | ■ Phe     | ■ Cit |
| ■ Val | ■ Tyr     | ■ Arg |

**Suppl. Fig. 1. Amino acid profiles in male offspring.** (A) Amino acid abundance in liver, muscle and serum in male offspring from Sed, MatEx, PatEx, and Mat+PatEx. Abundance is shown as the sum of  $\mu\text{M}$  concentration of AA by tissue. (B) Amino acid composition according to relative concentration in liver, muscle and serum. Amino acid color keys are show at the bottom of the figure. (\* $p < 0.05$  vs. Sed offspring;  $n = 8/\text{group}$ ).

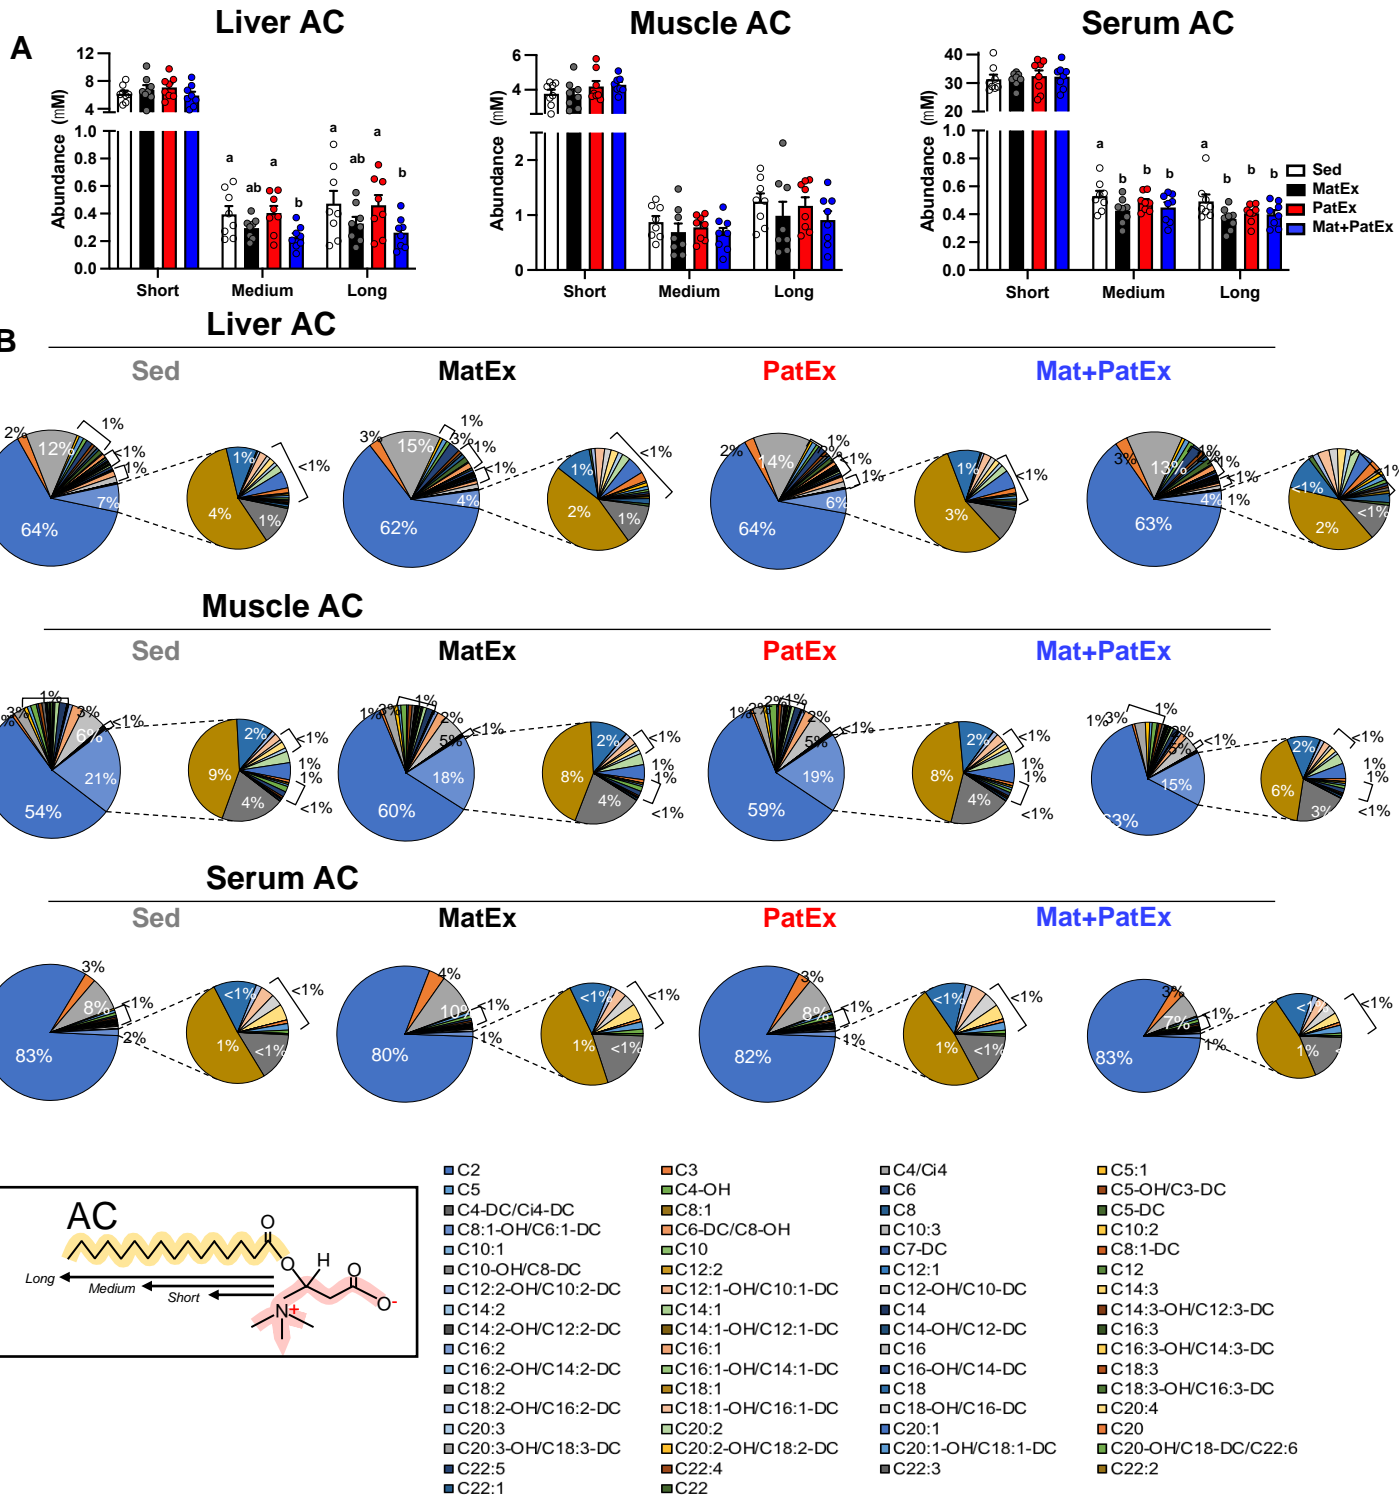

**Suppl. Fig. 2. Acylcarnitine profiles in male offspring.** (A) Short (C2-C10), medium (C12-C16), and long Acylcarnitine (C18-C22) abundance in liver, muscle and serum in male offspring from Sed, MatEx, PatEx, and Mat+PatEx. Abundance is shown as the sum of  $\mu\text{M}$  concentration of acylcarnitines by tissue. (B) Acylcarnitine composition according to relative concentration in liver, muscle and serum for short, medium and long AC. Acylcarnitine color keys are show at the bottom of the figure. (\* $p < 0.05$  vs. Sed offspring;  $n = 8/\text{group}$ ).

Suppl. Fig 3.

A

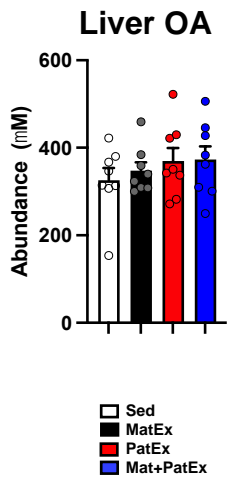

B

Liver OA

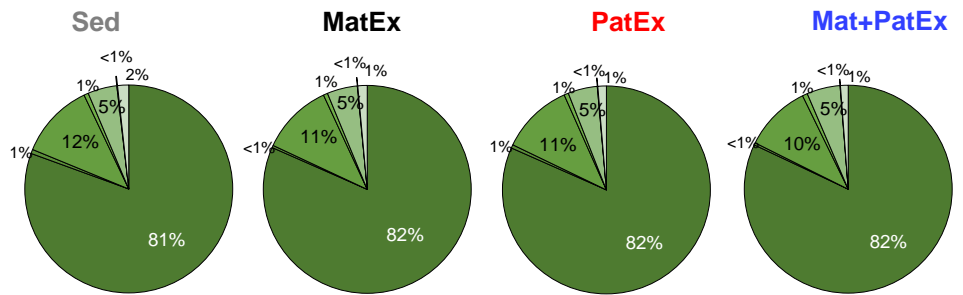

Muscle OA

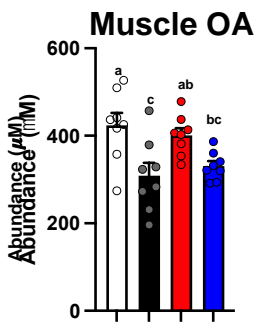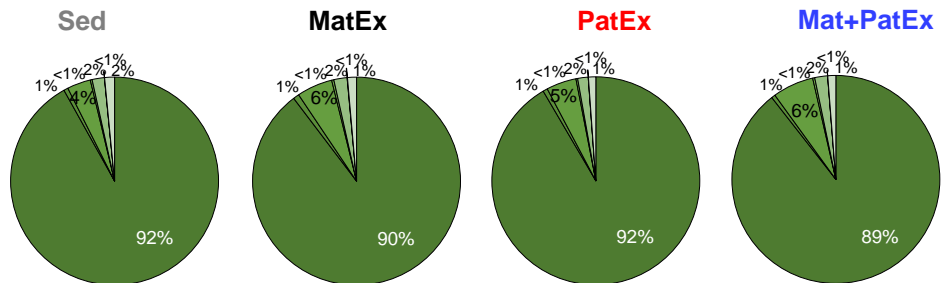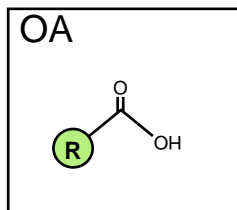

- Lactate
- Pyruvate
- Succinate
- Fumarate
- Malate
- a-Kg
- Citrate

**Suppl. Fig. 3. Organic acid profiles in male offspring.** (A) Organic acid abundance in liver and muscle in male offspring offspring from Sed, MatEx, PatEx, and Mat+PatEx. Abundance is shown as the sum of  $\mu\text{M}$  concentration of organic acids. (B) Organic acid composition according to relative concentration in liver and muscle. Organic acid color keys are show on the right side of the figure. (\* $p < 0.05$  vs. Sed offspring;  $n = 8/\text{group}$ ).

Suppl. Fig 4.

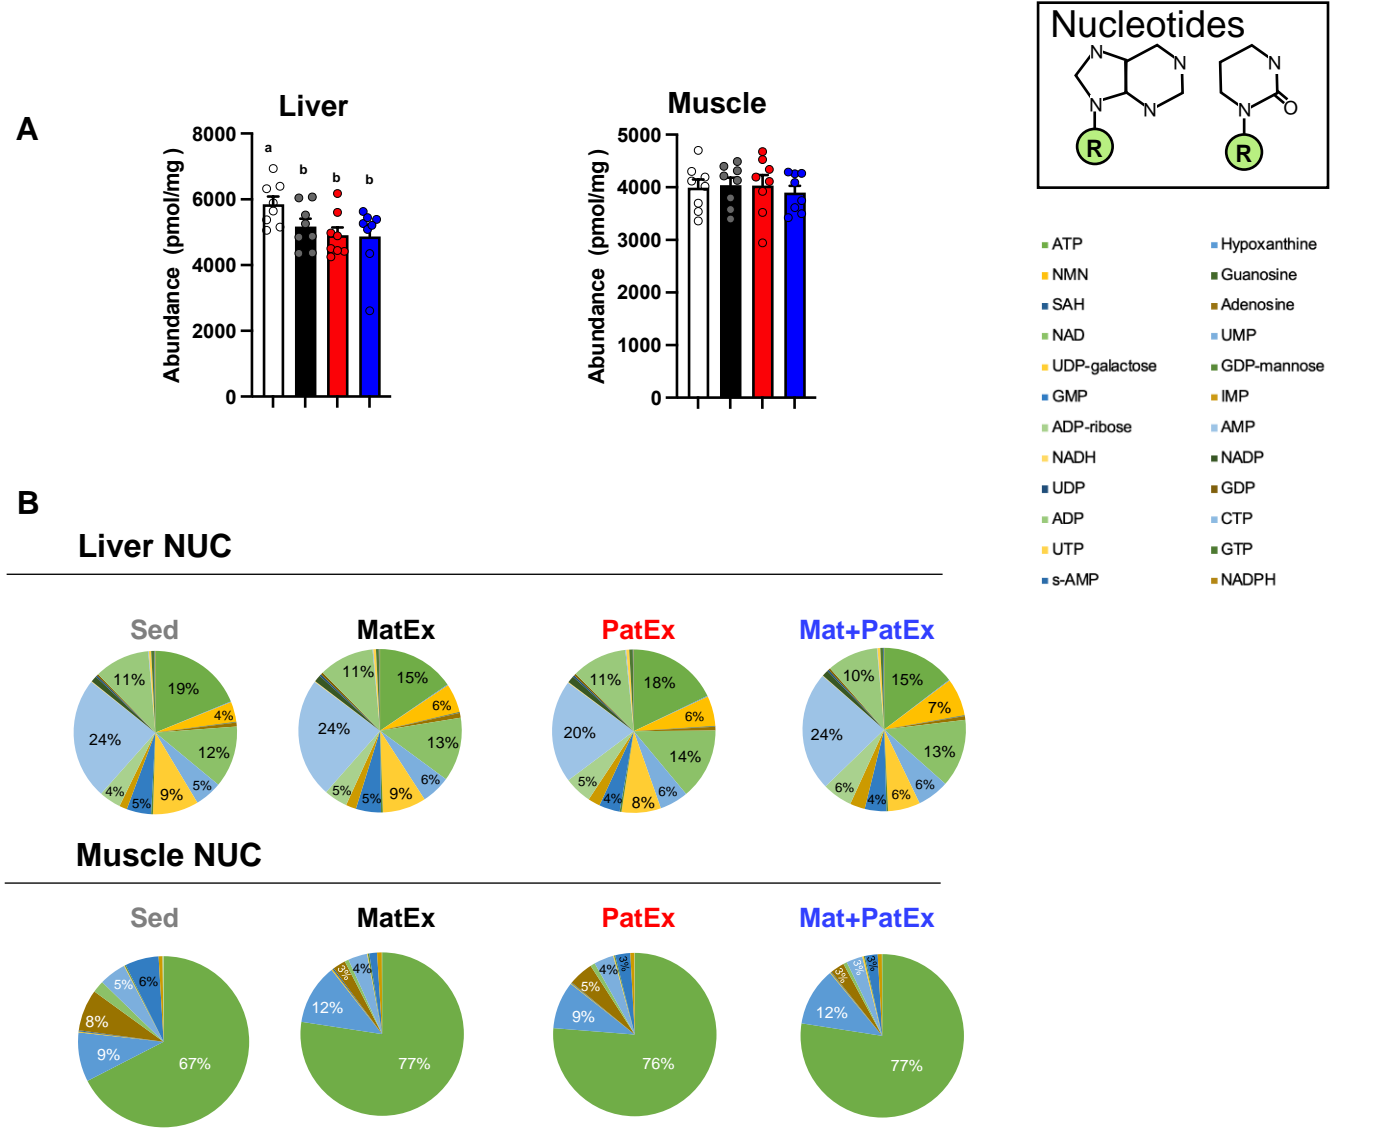

**Suppl. Fig. 4. Nucleotide profiles in male offspring.** (A) Nucleotide abundance in liver and muscle in male offspring from Sed, MatEx, PatEx, and Mat+PatEx. Abundance is shown as the sum of pmol/mg concentration of nucleotides by tissue. (B) Nucleotide composition according to relative concentration in liver and muscle. Nucleotide color keys are show on the right side of the figure. (\* $p < 0.05$  vs. Sed offspring;  $n = 8$ /group).
