# Supplementary material
Source: publisher figshare collection journal article supplement (https://diabetesjournals.figshare.com/articles/dataset/_/20301321)
Supplement: Supplementary file 2 [file 2]

**Supplementary Table 1. Characteristics of Dams.**

| Treatment                              | Sedentary HFD Dam (n=20) | Trained HFD Dam (n=20) |
|----------------------------------------|--------------------------|------------------------|
| Body weight (g)                        | 41.8±2.3                 | 33.4±0.6**             |
| Running Distance Pre-Pregnancy (km)    | 0                        | 65±9                   |
| Running Distance during gestation (km) | 0                        | 74±15                  |
| Total Running Distance (km)            | 0                        | 139±11                 |
| OGTT (AUC)                             | 282±13                   | 284±11                 |
| Fasting glucose (mg/dL)                | 175±6                    | 147±7**                |
| Fasting insulin (ng/mL)                | 1.1±0.2                  | 0.6±0.1*               |

**Supplementary Table 2. Characteristics of Sires.**

| Treatment                   | Sedentary HFD Sires (n=20) | Trained HFD Sires (n=20) |
|-----------------------------|----------------------------|--------------------------|
| Body weight (g)             | 42.8±3.2                   | 33±2.8*                  |
| Total Running Distance (km) | 0                          | 95±6.3                   |
| ipGTT (AUC)                 | 380±22                     | 300±13**                 |
| ipITT (AUC)                 | 165±12                     | 122±11*                  |
| Fasting glucose (mg/dL)     | 202±13                     | 165±6*                   |
| Fasting insulin (ng/mL)     | 4.2±0.7                    | 2.6±0.4*                 |

**Supplementary Table 3. Summary of non-significant exercise effects in liver metabolites.**

| Metabolite class | Metabolite                        | SED            | MATEX          | PATEX          | PAREX          |
|------------------|-----------------------------------|----------------|----------------|----------------|----------------|
| Amino acids      | Glycine <sup>§</sup>              | 99.94 ± 17.35  | 110.79 ± 7.10  | 90.18 ± 8.44   | 114.13 ± 5.52  |
|                  | Alanine <sup>§</sup>              | 113.45 ± 13.11 | 117.19 ± 10.75 | 141.20 ± 11.37 | 140.37 ± 11.46 |
|                  | Valine <sup>§</sup>               | 10.92 ± 0.77   | 13.13 ± 1.17   | 12.02 ± 0.61   | 12.42 ± 0.70   |
|                  | Methionine <sup>§</sup>           | 2.07 ± 0.18    | 2.89 ± 0.40    | 1.94 ± 0.11    | 2.72 ± 0.25    |
|                  | Aspartate/Asparagine <sup>§</sup> | 14.42 ± 1.29   | 17.59 ± 2.38   | 15.42 ± 1.45   | 18.10 ± 1.91   |
|                  | Glutamate/Glutamine <sup>§</sup>  | 89.75 ± 7.53   | 124.96 ± 12.56 | 92.57 ± 15.09  | 123.10 ± 11.84 |
| Organic acids    | Lactate <sup>§</sup>              | 262.38 ± 24.25 | 283.92 ± 13.58 | 301.78 ± 24.69 | 306.10 ± 27.24 |
|                  | Succinate <sup>§</sup>            | 38.20 ± 2.42   | 38.75 ± 3.49   | 41.40 ± 2.60   | 38.86 ± 3.16   |

|             |                               |                    |                    |                    |                    |
|-------------|-------------------------------|--------------------|--------------------|--------------------|--------------------|
|             | Fumarate <sup>\$</sup>        | 2.28 ± 0.17        | 2.31 ± 0.20        | 2.53 ± 0.19        | 2.93 ± 0.31        |
|             | Malate <sup>\$</sup>          | 14.76 ± 1.37       | 16.43 ± 1.70       | 16.89 ± 1.60       | 19.38 ± 2.21       |
|             | Citrate <sup>\$</sup>         | 5.61 ± 0.64        | 5.07 ± 0.44        | 4.88 ± 0.52        | 4.47 ± 0.46        |
| Nucleotides | Hypoxanthine <sup>#</sup>     | 7.83 ± 1.69        | 8.67 ± 1.27        | 8.09 ± 1.35        | 7.62 ± 1.56        |
|             | Guanosine <sup>#</sup>        | 6.98 ± 0.36        | 7.05 ± 0.44        | 5.55 ± 0.99        | 5.36 ± 0.42        |
|             | SAH <sup>#</sup>              | 2.22 ± 0.26        | 2.64 ± 0.33        | 2.27 ± 0.29        | 3.12 ± 0.67        |
|             | Adenosine <sup>#</sup>        | 45.68 ± 4.17       | 49.26 ± 2.92       | 36.39 ± 3.57       | 36.55 ± 3.95       |
|             | NAD <sup>#</sup>              | 713.01 ± 58.31     | 654.06 ± 53.60     | 690.58 ± 54.66     | 655.88 ± 56.37     |
|             | UMP <sup>#</sup>              | 315.00 ± 25.02     | 297.25 ± 19.82     | 278.94 ± 22.99     | 308.01 ± 31.10     |
|             | IMP <sup>#</sup>              | 90.10 ± 15.73      | 105.96 ± 11.34     | 117.65 ± 16.33     | 144.88 ± 25.33     |
|             | ADP-ribose <sup>#</sup>       | 253.50 ± 17.31     | 240.88 ± 32.96     | 268.71 ± 37.97     | 289.77 ± 29.51     |
|             | NADH <sup>#</sup>             | 7.47 ± 3.46        | 7.66 ± 3.65        | 7.35 ± 2.81        | 4.58 ± 2.85        |
|             | NADP <sup>#</sup>             | 70.26 ± 3.99       | 70.79 ± 6.11       | 66.95 ± 3.31       | 60.78 ± 3.43       |
|             | UDP <sup>#</sup>              | 18.15 ± 1.38       | 19.11 ± 2.25       | 17.10 ± 1.54       | 15.67 ± 1.71       |
|             | GDP <sup>#</sup>              | 19.67 ± 1.80       | 24.50 ± 2.83       | 19.50 ± 2.77       | 18.74 ± 1.47       |
|             | CTP <sup>#</sup>              | 8.05 ± 1.49        | 7.52 ± 1.09        | 9.28 ± 1.10        | 5.39 ± 1.00        |
|             | UTP <sup>#</sup>              | 26.65 ± 4.62       | 27.21 ± 4.41       | 28.76 ± 2.73       | 27.39 ± 3.58       |
|             | GTP <sup>#</sup>              | 32.63 ± 5.74       | 28.69 ± 5.24       | 34.11 ± 4.05       | 25.18 ± 2.56       |
|             | s-AMP <sup>#</sup>            | 7.94 ± 1.55        | 7.77 ± 1.15        | 5.52 ± 0.78        | 8.59 ± 0.85        |
|             | NADPH <sup>#</sup>            | 6.88 ± 2.54        | 5.11 ± 1.44        | 3.78 ± 1.14        | 3.60 ± 0.89        |
| Short ACC   | C2 <sup>\$</sup>              | 4.48 ± 0.35        | 4.61 ± 0.36        | 5.07 ± 0.41        | 4.06 ± 0.26        |
|             | C3 <sup>\$</sup>              | 0.1545 ±<br>0.0039 | 0.1882 ±<br>0.0215 | 0.1817 ±<br>0.0189 | 0.1901 ±<br>0.0199 |
|             | C4/Ci4 <sup>\$</sup>          | 0.8640 ±<br>0.0910 | 1.0985 ±<br>0.2537 | 1.0919 ±<br>0.1706 | 0.8653 ±<br>0.2416 |
|             | C5:1 <sup>\$</sup>            | 0.0426 ±<br>0.0038 | 0.0509 ±<br>0.0053 | 0.0461 ±<br>0.0050 | 0.0495 ±<br>0.0036 |
|             | C5 <sup>\$</sup>              | 0.0760 ±<br>0.0089 | 0.0789 ±<br>0.0098 | 0.0871 ±<br>0.0087 | 0.0741 ±<br>0.0129 |
|             | C6 <sup>\$</sup>              | 0.1047 ±<br>0.0154 | 0.1931 ±<br>0.0589 | 0.1418 ±<br>0.0264 | 0.1512 ±<br>0.0661 |
|             | C5-OH/C3-DC <sup>\$</sup>     | 0.0500 ±<br>0.0047 | 0.0539 ±<br>0.0024 | 0.0574 ±<br>0.0026 | 0.0545 ±<br>0.0055 |
|             | C4-DC/Ci4-DC <sup>\$</sup>    | 0.0592 ±<br>0.0072 | 0.0373 ±<br>0.0030 | 0.0551 ±<br>0.0125 | 0.0444 ±<br>0.0030 |
|             | C8:1 <sup>\$</sup>            | 0.0023 ±<br>0.0004 | 0.0024 ±<br>0.0004 | 0.0023 ±<br>0.0004 | 0.0023 ±<br>0.0005 |
|             | C5-DC <sup>\$</sup>           | 0.0726 ±<br>0.0087 | 0.0973 ±<br>0.0111 | 0.0779 ±<br>0.0094 | 0.0940 ±<br>0.0112 |
|             | C8:1-OH/C6:1-DC <sup>\$</sup> | 0.0201 ±<br>0.0019 | 0.0206 ±<br>0.0024 | 0.0201 ±<br>0.0018 | 0.0184 ±<br>0.0008 |
|             | C6-DC/C8-OH <sup>\$</sup>     | 0.0644 ±<br>0.0129 | 0.1000 ±<br>0.0082 | 0.0705 ±<br>0.0115 | 0.0897 ±<br>0.0152 |
|             | C10:3 <sup>\$</sup>           | 0.0025 ±<br>0.0003 | 0.0026 ±<br>0.0005 | 0.0031 ±<br>0.0004 | 0.0031 ±<br>0.0003 |
|             | C10:2 <sup>\$</sup>           | 0.0023 ±<br>0.0003 | 0.0020 ±<br>0.0005 | 0.0021 ±<br>0.0004 | 0.0022 ±<br>0.0008 |
|             | C10 <sup>\$</sup>             | 0.0284 ±<br>0.0055 | 0.0261 ±<br>0.0030 | 0.0210 ±<br>0.0009 | 0.0205 ±<br>0.0016 |
|             | C7-DC <sup>\$</sup>           | 0.0289 ±<br>0.0071 | 0.0412 ±<br>0.0077 | 0.0253 ±<br>0.0043 | 0.0347 ±<br>0.0062 |
|             | C8:1-DC <sup>\$</sup>         | 0.0094 ±<br>0.0011 | 0.0121 ±<br>0.0013 | 0.0089 ±<br>0.0017 | 0.0104 ±<br>0.0013 |

|          |                                 |                    |                    |                    |                    |
|----------|---------------------------------|--------------------|--------------------|--------------------|--------------------|
|          | C10-OH/C8-DC <sup>\$</sup>      | 0.0112 ±<br>0.0017 | 0.0130 ±<br>0.0012 | 0.0095 ±<br>0.0010 | 0.0108 ±<br>0.0010 |
|          | C12:2 <sup>\$</sup>             | 0.0029 ±<br>0.0003 | 0.0025 ±<br>0.0004 | 0.0022 ±<br>0.0002 | 0.0021 ±<br>0.0003 |
|          | C12:1 <sup>\$</sup>             | 0.0109 ±<br>0.0021 | 0.0090 ±<br>0.0011 | 0.0088 ±<br>0.0013 | 0.0078 ±<br>0.0008 |
|          | C12:2-OH/C10:2-DC <sup>\$</sup> | 0.0051 ±<br>0.0006 | 0.0045 ±<br>0.0004 | 0.0042 ±<br>0.0006 | 0.0048 ±<br>0.0012 |
|          | C12:1-OH/C10:1-DC <sup>\$</sup> | 0.0049 ±<br>0.0006 | 0.0049 ±<br>0.0006 | 0.0047 ±<br>0.0005 | 0.0051 ±<br>0.0007 |
|          | C12-OH/C10-DC <sup>\$</sup>     | 0.0049 ±<br>0.0006 | 0.0043 ±<br>0.0005 | 0.0057 ±<br>0.0003 | 0.0042 ±<br>0.0006 |
|          | C14:3 <sup>\$</sup>             | 0.0020 ±<br>0.0003 | 0.0014 ±<br>0.0001 | 0.0019 ±<br>0.0002 | 0.0020 ±<br>0.0003 |
|          | C14:2-OH/C12:2-DC <sup>\$</sup> | 0.0023 ±<br>0.0004 | 0.0033 ±<br>0.0004 | 0.0031 ±<br>0.0006 | 0.0042 ±<br>0.0011 |
|          | C14:1-OH/C12:1-DC <sup>\$</sup> | 0.0108 ±<br>0.0009 | 0.0086 ±<br>0.0006 | 0.0125 ±<br>0.0018 | 0.0099 ±<br>0.0010 |
|          | C14-OH/C12-DC <sup>\$</sup>     | 0.0039 ±<br>0.0006 | 0.0034 ±<br>0.0004 | 0.0037 ±<br>0.0004 | 0.0034 ±<br>0.0005 |
| Long ACC | C16:3 <sup>\$</sup>             | 0.0024 ±<br>0.0005 | 0.0020 ±<br>0.0002 | 0.0026 ±<br>0.0005 | 0.0018 ±<br>0.0002 |
|          | C16:2 <sup>\$</sup>             | 0.0084 ±<br>0.0014 | 0.0073 ±<br>0.0012 | 0.0077 ±<br>0.0007 | 0.0059 ±<br>0.0011 |
|          | C16 <sup>\$</sup>               | 0.1056 ±<br>0.0196 | 0.0844 ±<br>0.0092 | 0.1110 ±<br>0.0156 | 0.0571 ±<br>0.0080 |
|          | C16:3-OH/C14:3-DC <sup>\$</sup> | 0.0017 ±<br>0.0004 | 0.0018 ±<br>0.0004 | 0.0021 ±<br>0.0003 | 0.0017 ±<br>0.0003 |
|          | C16:1-OH/C14:1-DC <sup>\$</sup> | 0.0089 ±<br>0.0013 | 0.0078 ±<br>0.0008 | 0.0110 ±<br>0.0013 | 0.0091 ±<br>0.0012 |
|          | C16-OH/C14-DC <sup>\$</sup>     | 0.0068 ±<br>0.0007 | 0.0064 ±<br>0.0004 | 0.0071 ±<br>0.0007 | 0.0066 ±<br>0.0010 |
|          | C18:3 <sup>\$</sup>             | 0.0057 ±<br>0.0011 | 0.0061 ±<br>0.0006 | 0.0060 ±<br>0.0009 | 0.0051 ±<br>0.0012 |
|          | C18:2 <sup>\$</sup>             | 0.0574 ±<br>0.0154 | 0.0414 ±<br>0.0084 | 0.0473 ±<br>0.0058 | 0.0300 ±<br>0.0063 |
|          | C18:1 <sup>\$</sup>             | 0.2602 ±<br>0.0530 | 0.1464 ±<br>0.0253 | 0.2547 ±<br>0.0457 | 0.1026 ±<br>0.0207 |
|          | C18 <sup>\$</sup>               | 0.0454 ±<br>0.0071 | 0.0370 ±<br>0.0038 | 0.0476 ±<br>0.0087 | 0.0281 ±<br>0.0034 |
|          | C18:3-OH/C16:3-DC <sup>\$</sup> | 0.0019 ±<br>0.0005 | 0.0021 ±<br>0.0003 | 0.0021 ±<br>0.0002 | 0.0037 ±<br>0.0008 |
|          | C18:2-OH/C16:2-DC <sup>\$</sup> | 0.0036 ±<br>0.0013 | 0.0040 ±<br>0.0005 | 0.0036 ±<br>0.0003 | 0.0046 ±<br>0.0007 |
|          | C18:1-OH/C16:1-DC <sup>\$</sup> | 0.0113 ±<br>0.0022 | 0.0098 ±<br>0.0013 | 0.0111 ±<br>0.0017 | 0.0095 ±<br>0.0017 |
|          | C18-OH/C16-DC <sup>\$</sup>     | 0.0058 ±<br>0.0009 | 0.0067 ±<br>0.0006 | 0.0073 ±<br>0.0009 | 0.0070 ±<br>0.0005 |
|          | C20:4 <sup>\$</sup>             | 0.0089 ±<br>0.0010 | 0.0076 ±<br>0.0011 | 0.0073 ±<br>0.0012 | 0.0071 ±<br>0.0008 |
|          | C20:3 <sup>\$</sup>             | 0.0052 ±<br>0.0006 | 0.0048 ±<br>0.0006 | 0.0053 ±<br>0.0005 | 0.0045 ±<br>0.0008 |

|  |                                       |                    |                    |                    |                    |
|--|---------------------------------------|--------------------|--------------------|--------------------|--------------------|
|  | C20:2 <sup>\$</sup>                   | 0.0113 ±<br>0.0029 | 0.0084 ±<br>0.0016 | 0.0099 ±<br>0.0025 | 0.0069 ±<br>0.0014 |
|  | C20:1 <sup>\$</sup>                   | 0.0256 ±<br>0.0045 | 0.0182 ±<br>0.0033 | 0.0266 ±<br>0.0051 | 0.0121 ±<br>0.0026 |
|  | C20 <sup>\$</sup>                     | 0.0074 ±<br>0.0011 | 0.0095 ±<br>0.0016 | 0.0075 ±<br>0.0007 | 0.0086 ±<br>0.0010 |
|  | C20:3-OH/C18:3-DC <sup>\$</sup>       | 0.0016 ±<br>0.0003 | 0.0018 ±<br>0.0004 | 0.0020 ±<br>0.0004 | 0.0024 ±<br>0.0003 |
|  | C20:2-OH/C18:2-DC <sup>\$</sup>       | 0.0023 ±<br>0.0007 | 0.0036 ±<br>0.0006 | 0.0022 ±<br>0.0004 | 0.0032 ±<br>0.0005 |
|  | C20:1-OH/C18:1-DC <sup>\$</sup>       | 0.0036 ±<br>0.0005 | 0.0035 ±<br>0.0005 | 0.0044 ±<br>0.0004 | 0.0042 ±<br>0.0004 |
|  | C20-OH/C18-<br>DC/C22:6 <sup>\$</sup> | 0.0028 ±<br>0.0003 | 0.0024 ±<br>0.0004 | 0.0031 ±<br>0.0004 | 0.0029 ±<br>0.0007 |
|  | C22:5 <sup>\$</sup>                   | 0.0019 ±<br>0.0004 | 0.0022 ±<br>0.0004 | 0.0027 ±<br>0.0003 | 0.0024 ±<br>0.0007 |
|  | C22:4 <sup>\$</sup>                   | 0.0020 ±<br>0.0002 | 0.0016 ±<br>0.0003 | 0.0016 ±<br>0.0003 | 0.0016 ±<br>0.0002 |
|  | C22:2 <sup>\$</sup>                   | 0.0016 ±<br>0.0002 | 0.0019 ±<br>0.0003 | 0.0022 ±<br>0.0002 | 0.0022 ±<br>0.0003 |
|  | C22:1 <sup>\$</sup>                   | 0.0038 ±<br>0.0009 | 0.0054 ±<br>0.0011 | 0.0037 ±<br>0.0005 | 0.0075 ±<br>0.0014 |
|  | C22 <sup>\$</sup>                     | 0.0021 ±<br>0.0005 | 0.0023 ±<br>0.0003 | 0.0016 ±<br>0.0003 | 0.0023 ±<br>0.0006 |

<sup>\$</sup> Metabolite concentrations are expressed as  $\mu\text{M}$ . <sup>#</sup> Metabolite concentrations are expressed as pmol/mg. Data are presented as means  $\pm$  SEM.

**Supplementary Table 4. Summary of non-significant exercise effects in muscle metabolites.**

| Metabolite class | Metabolites                       | SED             | MATEX           | PATEX           | PAREX           |
|------------------|-----------------------------------|-----------------|-----------------|-----------------|-----------------|
| Amino acids      | Glycine <sup>s</sup>              | 56.17 ± 3.08    | 61.34 ± 3.71    | 59.03 ± 3.46    | 56.19 ± 5.24    |
|                  | Alanine <sup>s</sup>              | 86.31 ± 6.16    | 94.40 ± 7.67    | 95.55 ± 2.51    | 101.91 ± 3.92   |
|                  | Proline <sup>s</sup>              | 6.30 ± 0.35     | 6.57 ± 0.47     | 6.49 ± 0.32     | 6.47 ± 0.23     |
|                  | Valine <sup>s</sup>               | 9.80 ± 0.51     | 10.01 ± 0.85    | 9.10 ± 0.25     | 10.02 ± 0.35    |
|                  | Leucine/Isoleucine <sup>s</sup>   | 17.23 ± 0.92    | 17.79 ± 1.35    | 17.68 ± 0.62    | 17.33 ± 0.93    |
|                  | Methionine <sup>s</sup>           | 4.26 ± 0.36     | 4.19 ± 0.34     | 4.18 ± 0.21     | 4.41 ± 0.21     |
|                  | Histidine <sup>s</sup>            | 6.53 ± 0.26     | 7.76 ± 0.50     | 7.33 ± 0.36     | 6.71 ± 0.26     |
|                  | Phenylalanine <sup>s</sup>        | 3.53 ± 0.29     | 3.60 ± 0.40     | 3.57 ± 0.20     | 3.33 ± 0.17     |
|                  | Tyrosine <sup>s</sup>             | 4.68 ± 0.43     | 5.40 ± 0.47     | 4.36 ± 0.32     | 4.30 ± 0.22     |
|                  | Aspartate/Asparagine <sup>s</sup> | 8.67 ± 1.21     | 10.04 ± 1.00    | 6.71 ± 0.62     | 10.01 ± 0.68    |
|                  | Glutamate/Glutamine <sup>s</sup>  | 43.16 ± 4.13    | 42.34 ± 1.67    | 35.74 ± 1.82    | 41.18 ± 1.79    |
|                  | Ornithine <sup>s</sup>            | 2.19 ± 0.13     | 2.62 ± 0.36     | 1.95 ± 0.09     | 2.33 ± 0.20     |
|                  | Citrulline <sup>s</sup>           | 3.50 ± 0.24     | 3.84 ± 0.32     | 3.51 ± 0.23     | 3.73 ± 0.15     |
| Organic acids    | Pyruvate <sup>s</sup>             | 2.84 ± 0.46     | 2.88 ± 0.54     | 2.87 ± 0.43     | 1.98 ± 0.27     |
|                  | Fumarate <sup>s</sup>             | 1.20 ± 0.06     | 1.03 ± 0.08     | 1.08 ± 0.08     | 1.06 ± 0.06     |
|                  | α-Ketoglutarate <sup>s</sup>      | 0.13 ± 0.02     | 0.17 ± 0.03     | 0.13 ± 0.02     | 0.09 ± 0.01     |
| Nucleotides      | GDP-mannose <sup>#</sup>          | 2.55 ± 0.18     | 3.06 ± 0.23     | 2.81 ± 0.21     | 2.77 ± 0.05     |
|                  | GMP <sup>#</sup>                  | 7.39 ± 1.40     | 9.01 ± 2.52     | 4.65 ± 0.26     | 4.82 ± 0.40     |
|                  | NADH <sup>#</sup>                 | 5.32 ± 1.10     | 5.59 ± 1.54     | 6.75 ± 1.36     | 12.04 ± 2.68    |
| Short ACC        | C2 <sup>s</sup>                   | 3.21 ± 0.19     | 3.23 ± 0.23     | 3.65 ± 0.25     | 3.68 ± 0.14     |
|                  | C3 <sup>s</sup>                   | 0.0399 ± 0.0043 | 0.0365 ± 0.0041 | 0.0372 ± 0.0031 | 0.0425 ± 0.0029 |
|                  | C4/Ci4 <sup>s</sup>               | 0.1523 ± 0.0141 | 0.1465 ± 0.0251 | 0.1533 ± 0.0151 | 0.1784 ± 0.0131 |
|                  | C5 <sup>s</sup>                   | 0.0488 ± 0.0093 | 0.0372 ± 0.0042 | 0.0420 ± 0.0031 | 0.0439 ± 0.0037 |
|                  | C4-OH <sup>s</sup>                | 0.0804 ± 0.0092 | 0.0737 ± 0.0069 | 0.1099 ± 0.0281 | 0.0842 ± 0.0088 |
|                  | C6 <sup>s</sup>                   | 0.0300 ± 0.0021 | 0.0236 ± 0.0024 | 0.0248 ± 0.0025 | 0.0259 ± 0.0023 |
|                  | C5-OH/C3-DC <sup>s</sup>          | 0.0500 ± 0.0042 | 0.0500 ± 0.0034 | 0.0472 ± 0.0030 | 0.0572 ± 0.0015 |
|                  | C4-DC/Ci4-DC <sup>s</sup>         | 0.0469 ± 0.0066 | 0.0380 ± 0.0035 | 0.0379 ± 0.0033 | 0.0478 ± 0.0022 |
|                  | C8:1 <sup>s</sup>                 | 0.0022 ± 0.0006 | 0.0024 ± 0.0004 | 0.0020 ± 0.0003 | 0.0027 ± 0.0003 |
|                  | C5-DC <sup>s</sup>                | 0.0034 ± 0.0010 | 0.0024 ± 0.0003 | 0.0021 ± 0.0004 | 0.0041 ± 0.0007 |
|                  | C8:1-OH/C6:1-DC <sup>s</sup>      | 0.0025 ± 0.0005 | 0.0021 ± 0.0002 | 0.0019 ± 0.0003 | 0.0029 ± 0.0003 |
|                  | C6-DC/C8-OH <sup>s</sup>          | 0.0047 ± 0.0006 | 0.0041 ± 0.0004 | 0.0042 ± 0.0004 | 0.0050 ± 0.0005 |
|                  | C10:3 <sup>s</sup>                | 0.0008 ± 0.0003 | 0.0005 ± 0.0002 | 0.0004 ± 0.0002 | 0.0004 ± 0.0003 |
|                  | C10:2 <sup>s</sup>                | 0.0008 ± 0.0004 | 0.0009 ± 0.0003 | 0.0003 ± 0.0002 | 0.0008 ± 0.0003 |
|                  | C7-DC <sup>s</sup>                | 0.0015 ± 0.0006 | 0.0016 ± 0.0003 | 0.0009 ± 0.0003 | 0.0028 ± 0.0009 |
|                  | C8:1-DC <sup>s</sup>              | 0.0023 ± 0.0006 | 0.0016 ± 0.0002 | 0.0011 ± 0.0002 | 0.0024 ± 0.0005 |

|          |                                 |                    |                    |                    |                    |
|----------|---------------------------------|--------------------|--------------------|--------------------|--------------------|
|          | C12:2 <sup>\$</sup>             | 0.0011 ±<br>0.0005 | 0.0005 ±<br>0.0002 | 0.0010 ±<br>0.0003 | 0.0013 ±<br>0.0002 |
|          | C12 <sup>\$</sup>               | 0.0307 ±<br>0.0030 | 0.0237 ±<br>0.0031 | 0.0261 ±<br>0.0023 | 0.0278 ±<br>0.0041 |
|          | C12:2-OH/C10:2-DC <sup>\$</sup> | 0.0019 ±<br>0.0003 | 0.0017 ±<br>0.0003 | 0.0013 ±<br>0.0003 | 0.0017 ±<br>0.0004 |
|          | C12:1-OH/C10:1-DC <sup>\$</sup> | 0.0039 ±<br>0.0005 | 0.0026 ±<br>0.0002 | 0.0033 ±<br>0.0001 | 0.0034 ±<br>0.0004 |
|          | C12-OH/C10-DC <sup>\$</sup>     | 0.0045 ±<br>0.0006 | 0.0039 ±<br>0.0007 | 0.0040 ±<br>0.0004 | 0.0027 ±<br>0.0004 |
|          | C14:3 <sup>\$</sup>             | 0.0018 ±<br>0.0003 | 0.0014 ±<br>0.0002 | 0.0019 ±<br>0.0004 | 0.0017 ±<br>0.0002 |
|          | C14:2 <sup>\$</sup>             | 0.0161 ±<br>0.0018 | 0.0153 ±<br>0.0026 | 0.0132 ±<br>0.0014 | 0.0139 ±<br>0.0013 |
|          | C14 <sup>\$</sup>               | 0.1047 ±<br>0.0133 | 0.0839 ±<br>0.0153 | 0.0936 ±<br>0.0091 | 0.0803 ±<br>0.0126 |
|          | C14:3-OH/C12:3-DC <sup>\$</sup> | 0.0007 ±<br>0.0003 | 0.0005 ±<br>0.0002 | 0.0002 ±<br>0.0001 | 0.0006 ±<br>0.0003 |
|          | C14-OH/C12-DC <sup>\$</sup>     | 0.0068 ±<br>0.0006 | 0.0056 ±<br>0.0005 | 0.0062 ±<br>0.0004 | 0.0064 ±<br>0.0006 |
|          |                                 |                    |                    |                    |                    |
| Long ACC | C16:3 <sup>\$</sup>             | 0.0054 ±<br>0.0007 | 0.0048 ±<br>0.0009 | 0.0038 ±<br>0.0004 | 0.0038 ±<br>0.0004 |
|          | C16:2 <sup>\$</sup>             | 0.0531 ±<br>0.0058 | 0.0467 ±<br>0.0086 | 0.0455 ±<br>0.0047 | 0.0435 ±<br>0.0059 |
|          | C16:1 <sup>\$</sup>             | 0.1507 ±<br>0.0168 | 0.1155 ±<br>0.0258 | 0.1394 ±<br>0.0127 | 0.1094 ±<br>0.0165 |
|          | C16 <sup>\$</sup>               | 0.3628 ±<br>0.0502 | 0.2881 ±<br>0.0742 | 0.3263 ±<br>0.0419 | 0.2666 ±<br>0.0527 |
|          | C16:3-OH/C14:3-DC <sup>\$</sup> | 0.0011 ±<br>0.0003 | 0.0009 ±<br>0.0002 | 0.0005 ±<br>0.0002 | 0.0007 ±<br>0.0003 |
|          | C16:2-OH/C14:2-DC <sup>\$</sup> | 0.0075 ±<br>0.0006 | 0.0062 ±<br>0.0014 | 0.0067 ±<br>0.0005 | 0.0067 ±<br>0.0008 |
|          | C16:1-OH/C14:1-DC <sup>\$</sup> | 0.0169 ±<br>0.0012 | 0.0126 ±<br>0.0024 | 0.0164 ±<br>0.0017 | 0.0129 ±<br>0.0012 |
|          | C16-OH/C14-DC <sup>\$</sup>     | 0.0168 ±<br>0.0013 | 0.0123 ±<br>0.0022 | 0.0176 ±<br>0.0024 | 0.0116 ±<br>0.0016 |
|          | C18:3 <sup>\$</sup>             | 0.0166 ±<br>0.0015 | 0.0135 ±<br>0.0026 | 0.0175 ±<br>0.0020 | 0.0135 ±<br>0.0019 |
|          | C18:2 <sup>\$</sup>             | 0.2466 ±<br>0.0301 | 0.2134 ±<br>0.0576 | 0.2255 ±<br>0.0283 | 0.1773 ±<br>0.0320 |
|          | C18:1 <sup>\$</sup>             | 0.5348 ±<br>0.0691 | 0.4220 ±<br>0.1189 | 0.5134 ±<br>0.0666 | 0.3712 ±<br>0.0700 |
|          | C18 <sup>\$</sup>               | 0.1452 ±<br>0.0201 | 0.1160 ±<br>0.0250 | 0.1320 ±<br>0.0165 | 0.1144 ±<br>0.0194 |
|          | C18:3-OH/C16:3-DC <sup>\$</sup> | 0.0019 ±<br>0.0003 | 0.0014 ±<br>0.0003 | 0.0016 ±<br>0.0004 | 0.0020 ±<br>0.0004 |
|          | C18:2-OH/C16:2-DC <sup>\$</sup> | 0.0157 ±<br>0.0009 | 0.0152 ±<br>0.0024 | 0.0176 ±<br>0.0023 | 0.0135 ±<br>0.0017 |
|          | C18:1-OH/C16:1-DC <sup>\$</sup> | 0.0285 ±<br>0.0022 | 0.0236 ±<br>0.0043 | 0.0328 ±<br>0.0042 | 0.0225 ±<br>0.0022 |
|          | C18-OH/C16-DC <sup>\$</sup>     | 0.0112 ±<br>0.0011 | 0.0078 ±<br>0.0011 | 0.0112 ±<br>0.0014 | 0.0104 ±<br>0.0014 |
|          | C20:3 <sup>\$</sup>             | 0.0143 ±<br>0.0018 | 0.0113 ±<br>0.0022 | 0.0121 ±<br>0.0018 | 0.0103 ±<br>0.0017 |

|  |                                       |                    |                    |                    |                    |
|--|---------------------------------------|--------------------|--------------------|--------------------|--------------------|
|  | C20:2 <sup>\$</sup>                   | 0.0444 ±<br>0.0070 | 0.0348 ±<br>0.0085 | 0.0478 ±<br>0.0106 | 0.0365 ±<br>0.0059 |
|  | C20:1 <sup>\$</sup>                   | 0.0667 ±<br>0.0088 | 0.0466 ±<br>0.0104 | 0.0704 ±<br>0.0153 | 0.0525 ±<br>0.0089 |
|  | C20 <sup>\$</sup>                     | 0.0107 ±<br>0.0014 | 0.0098 ±<br>0.0023 | 0.0104 ±<br>0.0022 | 0.0096 ±<br>0.0017 |
|  | C20:3-OH/C18:3-DC <sup>\$</sup>       | 0.0021 ±<br>0.0004 | 0.0011 ±<br>0.0003 | 0.0014 ±<br>0.0003 | 0.0017 ±<br>0.0003 |
|  | C20:2-OH/C18:2-DC <sup>\$</sup>       | 0.0059 ±<br>0.0008 | 0.0047 ±<br>0.0006 | 0.0062 ±<br>0.0014 | 0.0057 ±<br>0.0005 |
|  | C20:1-OH/C18:1-DC <sup>\$</sup>       | 0.0081 ±<br>0.0009 | 0.0057 ±<br>0.0008 | 0.0082 ±<br>0.0014 | 0.0070 ±<br>0.0008 |
|  | C20-OH/C18-<br>DC/C22:6 <sup>\$</sup> | 0.0217 ±<br>0.0043 | 0.0151 ±<br>0.0063 | 0.0108 ±<br>0.0025 | 0.0107 ±<br>0.0024 |
|  | C22:5 <sup>\$</sup>                   | 0.0207 ±<br>0.0034 | 0.0144 ±<br>0.0039 | 0.0130 ±<br>0.0023 | 0.0151 ±<br>0.0035 |
|  | C22:2 <sup>\$</sup>                   | 0.0036 ±<br>0.0008 | 0.0033 ±<br>0.0007 | 0.0047 ±<br>0.0014 | 0.0038 ±<br>0.0004 |
|  | C22:1 <sup>\$</sup>                   | 0.0057 ±<br>0.0009 | 0.0051 ±<br>0.0007 | 0.0073 ±<br>0.0015 | 0.0071 ±<br>0.0010 |
|  | C22 <sup>\$</sup>                     | 0.0014 ±<br>0.0003 | 0.0012 ±<br>0.0001 | 0.0012 ±<br>0.0005 | 0.0017 ±<br>0.0002 |

<sup>\$</sup> Metabolite concentrations are expressed as  $\mu\text{M}$ . <sup>#</sup> Metabolite concentrations are expressed as pmol/mg. Data are presented as means  $\pm$  SEM.

**Supplementary Table 5. Summary of non-significant exercise effects in serum metabolites.**

| Metabolite class | Metabolite                       | SED             | MATEX           | PATEX           | PAREX           |
|------------------|----------------------------------|-----------------|-----------------|-----------------|-----------------|
| Amino acids      | Glycine <sup>\$</sup>            | 301.24 ± 14.40  | 316.85 ± 10.05  | 322.97 ± 12.02  | 338.28 ± 11.41  |
|                  | Alanine <sup>\$</sup>            | 439.85 ± 39.22  | 382.91 ± 23.52  | 469.79 ± 22.25  | 460.76 ± 23.65  |
|                  | Serine <sup>\$</sup>             | 132.45 ± 9.58   | 124.58 ± 9.55   | 147.09 ± 6.32   | 133.57 ± 3.17   |
|                  | Proline                          | 103.68 ± 10.99  | 99.10 ± 6.93    | 108.10 ± 4.27   | 105.80 ± 6.55   |
|                  | Leucine/Isoleucine <sup>\$</sup> | 257.24 ± 23.35  | 220.91 ± 12.27  | 237.55 ± 7.85   | 239.13 ± 12.21  |
|                  | Methionine <sup>\$</sup>         | 74.35 ± 8.51    | 72.43 ± 8.92    | 70.73 ± 2.10    | 73.66 ± 4.76    |
|                  | Phenylalanine <sup>\$</sup>      | 91.81 ± 7.21    | 88.17 ± 4.01    | 95.48 ± 2.59    | 87.63 ± 4.23    |
|                  | Tyrosine <sup>\$</sup>           | 94.63 ± 8.42    | 90.97 ± 3.57    | 87.70 ± 4.55    | 79.72 ± 2.52    |
|                  | Ornithine <sup>\$</sup>          | 174.92 ± 15.31  | 154.83 ± 12.34  | 147.85 ± 12.58  | 184.14 ± 18.98  |
|                  | Citrulline <sup>\$</sup>         | 58.96 ± 4.50    | 54.58 ± 1.91    | 56.54 ± 1.74    | 53.59 ± 2.50    |
|                  | Arginine <sup>\$</sup>           | 76.59 ± 8.39    | 87.11 ± 17.15   | 75.07 ± 15.33   | 62.27 ± 11.53   |
| Short ACC        | C2 <sup>\$</sup>                 | 26.85 ± 1.20    | 25.85 ± 0.64    | 27.40 ± 1.39    | 27.56 ± 0.88    |
|                  | C4/Ci4 <sup>\$</sup>             | 2.60 ± 0.49     | 3.09 ± 0.38     | 2.80 ± 0.48     | 2.36 ± 0.41     |
|                  | C5:1 <sup>\$</sup>               | 0.1252 ± 0.0119 | 0.1087 ± 0.0046 | 0.1274 ± 0.0100 | 0.1084 ± 0.0071 |
|                  | C5 <sup>\$</sup>                 | 0.2036 ± 0.0238 | 0.2549 ± 0.0229 | 0.2569 ± 0.0143 | 0.2285 ± 0.0245 |
|                  | C6 <sup>\$</sup>                 | 0.1199 ± 0.0289 | 0.1631 ± 0.0382 | 0.1089 ± 0.0139 | 0.1504 ± 0.0245 |
|                  | C5-OH/C3-DC <sup>\$</sup>        | 0.1280 ± 0.0061 | 0.1372 ± 0.0082 | 0.1450 ± 0.0101 | 0.1590 ± 0.0111 |
|                  | C8:1 <sup>\$</sup>               | 0.0093 ± 0.0005 | 0.0071 ± 0.0009 | 0.0079 ± 0.0008 | 0.0100 ± 0.0010 |
|                  | C8 <sup>\$</sup>                 | 0.0223 ± 0.0018 | 0.0214 ± 0.0013 | 0.0207 ± 0.0017 | 0.0274 ± 0.0022 |
|                  | C5-DC <sup>\$</sup>              | 0.0225 ± 0.0032 | 0.0231 ± 0.0028 | 0.0223 ± 0.0023 | 0.0324 ± 0.0048 |
|                  | C6-DC/C8-OH <sup>\$</sup>        | 0.0309 ± 0.0030 | 0.0304 ± 0.0028 | 0.0282 ± 0.0024 | 0.0357 ± 0.0032 |
|                  | C10:3 <sup>\$</sup>              | 0.0044 ± 0.0008 | 0.0033 ± 0.0008 | 0.0039 ± 0.0006 | 0.0030 ± 0.0007 |
|                  | C10:2 <sup>\$</sup>              | 0.0042 ± 0.0008 | 0.0045 ± 0.0003 | 0.0056 ± 0.0010 | 0.0050 ± 0.0004 |
|                  | C10:1 <sup>\$</sup>              | 0.0117 ± 0.0017 | 0.0133 ± 0.0014 | 0.0163 ± 0.0014 | 0.0137 ± 0.0014 |
|                  | C10 <sup>\$</sup>                | 0.0254 ± 0.0013 | 0.0216 ± 0.0020 | 0.0237 ± 0.0018 | 0.0222 ± 0.0020 |
|                  | C7-DC <sup>\$</sup>              | 0.0128 ± 0.0007 | 0.0134 ± 0.0013 | 0.0122 ± 0.0005 | 0.0157 ± 0.0023 |
|                  | C8:1-DC <sup>\$</sup>            | 0.0067 ± 0.0004 | 0.0058 ± 0.0005 | 0.0061 ± 0.0002 | 0.0067 ± 0.0011 |
|                  | C10-OH/C8-DC <sup>\$</sup>       | 0.0178 ± 0.0013 | 0.0158 ± 0.0013 | 0.0184 ± 0.0012 | 0.0167 ± 0.0014 |
|                  | C12:1 <sup>\$</sup>              | 0.0136 ± 0.0019 | 0.0124 ± 0.0015 | 0.0147 ± 0.0012 | 0.0140 ± 0.0011 |
|                  | C12 <sup>\$</sup>                | 0.0239 ± 0.0014 | 0.0208 ± 0.0016 | 0.0246 ± 0.0008 | 0.0218 ± 0.0017 |
|                  | C12-OH/C10-DC <sup>\$</sup>      | 0.0096 ± 0.0008 | 0.0080 ± 0.0009 | 0.0088 ± 0.0007 | 0.0067 ± 0.0011 |
|                  | C14:2 <sup>\$</sup>              | 0.0187 ± 0.0011 | 0.0153 ± 0.0015 | 0.0193 ± 0.0016 | 0.0191 ± 0.0025 |
|                  | C14 <sup>\$</sup>                | 0.0644 ± 0.0049 | 0.0544 ± 0.0038 | 0.0575 ± 0.0023 | 0.0556 ± 0.0038 |
|                  | C14:1-OH <sup>\$</sup>           | 0.0174 ± 0.0011 | 0.0144 ± 0.0015 | 0.0200 ± 0.0010 | 0.0168 ± 0.0017 |
|                  | C14-OH/C12-DC <sup>\$</sup>      | 0.0092 ± 0.0006 | 0.0084 ± 0.0008 | 0.0082 ± 0.0005 | 0.0079 ± 0.0009 |
| Long ACC         | C16:2 <sup>\$</sup>              | 0.0143 ± 0.0009 | 0.0143 ± 0.0015 | 0.0153 ± 0.0010 | 0.0146 ± 0.0016 |
|                  | C16:1 <sup>\$</sup>              | 0.0710 ± 0.0081 | 0.0556 ± 0.0056 | 0.0656 ± 0.0052 | 0.0575 ± 0.0061 |
|                  | C16-OH/C14-DC <sup>\$</sup>      | 0.0124 ± 0.0013 | 0.0109 ± 0.0011 | 0.0126 ± 0.0014 | 0.0113 ± 0.0012 |
|                  | C18:2 <sup>\$</sup>              | 0.0765 ± 0.0050 | 0.0711 ± 0.0066 | 0.0672 ± 0.0034 | 0.0723 ± 0.0053 |
|                  | C18:2-OH <sup>\$</sup>           | 0.0090 ± 0.0009 | 0.0067 ± 0.0004 | 0.0086 ± 0.0008 | 0.0086 ± 0.0011 |
|                  | C18-OH/C16-DC <sup>\$</sup>      | 0.0187 ± 0.0014 | 0.0140 ± 0.0022 | 0.0198 ± 0.0020 | 0.0178 ± 0.0014 |
|                  | C20 <sup>\$</sup>                | 0.0057 ± 0.0005 | 0.0035 ± 0.0008 | 0.0043 ± 0.0005 | 0.0046 ± 0.0009 |
|                  | C18:1-DC <sup>\$</sup>           | 0.0102 ± 0.0014 | 0.0084 ± 0.0011 | 0.0105 ± 0.0010 | 0.0118 ± 0.0013 |
|                  | C20-OH/C18-DC <sup>\$</sup>      | 0.0053 ± 0.0003 | 0.0051 ± 0.0007 | 0.0051 ± 0.0006 | 0.0045 ± 0.0004 |
|                  | C22 <sup>\$</sup>                | 0.0019 ± 0.0006 | 0.0028 ± 0.0005 | 0.0024 ± 0.0004 | 0.0023 ± 0.0004 |

<sup>\$</sup> Metabolite concentrations are expressed as  $\mu\text{M}$ . <sup>#</sup> Metabolite concentrations are expressed as pmol/mg. Data are presented as means ± SEM.



Suppl. Fig 1.

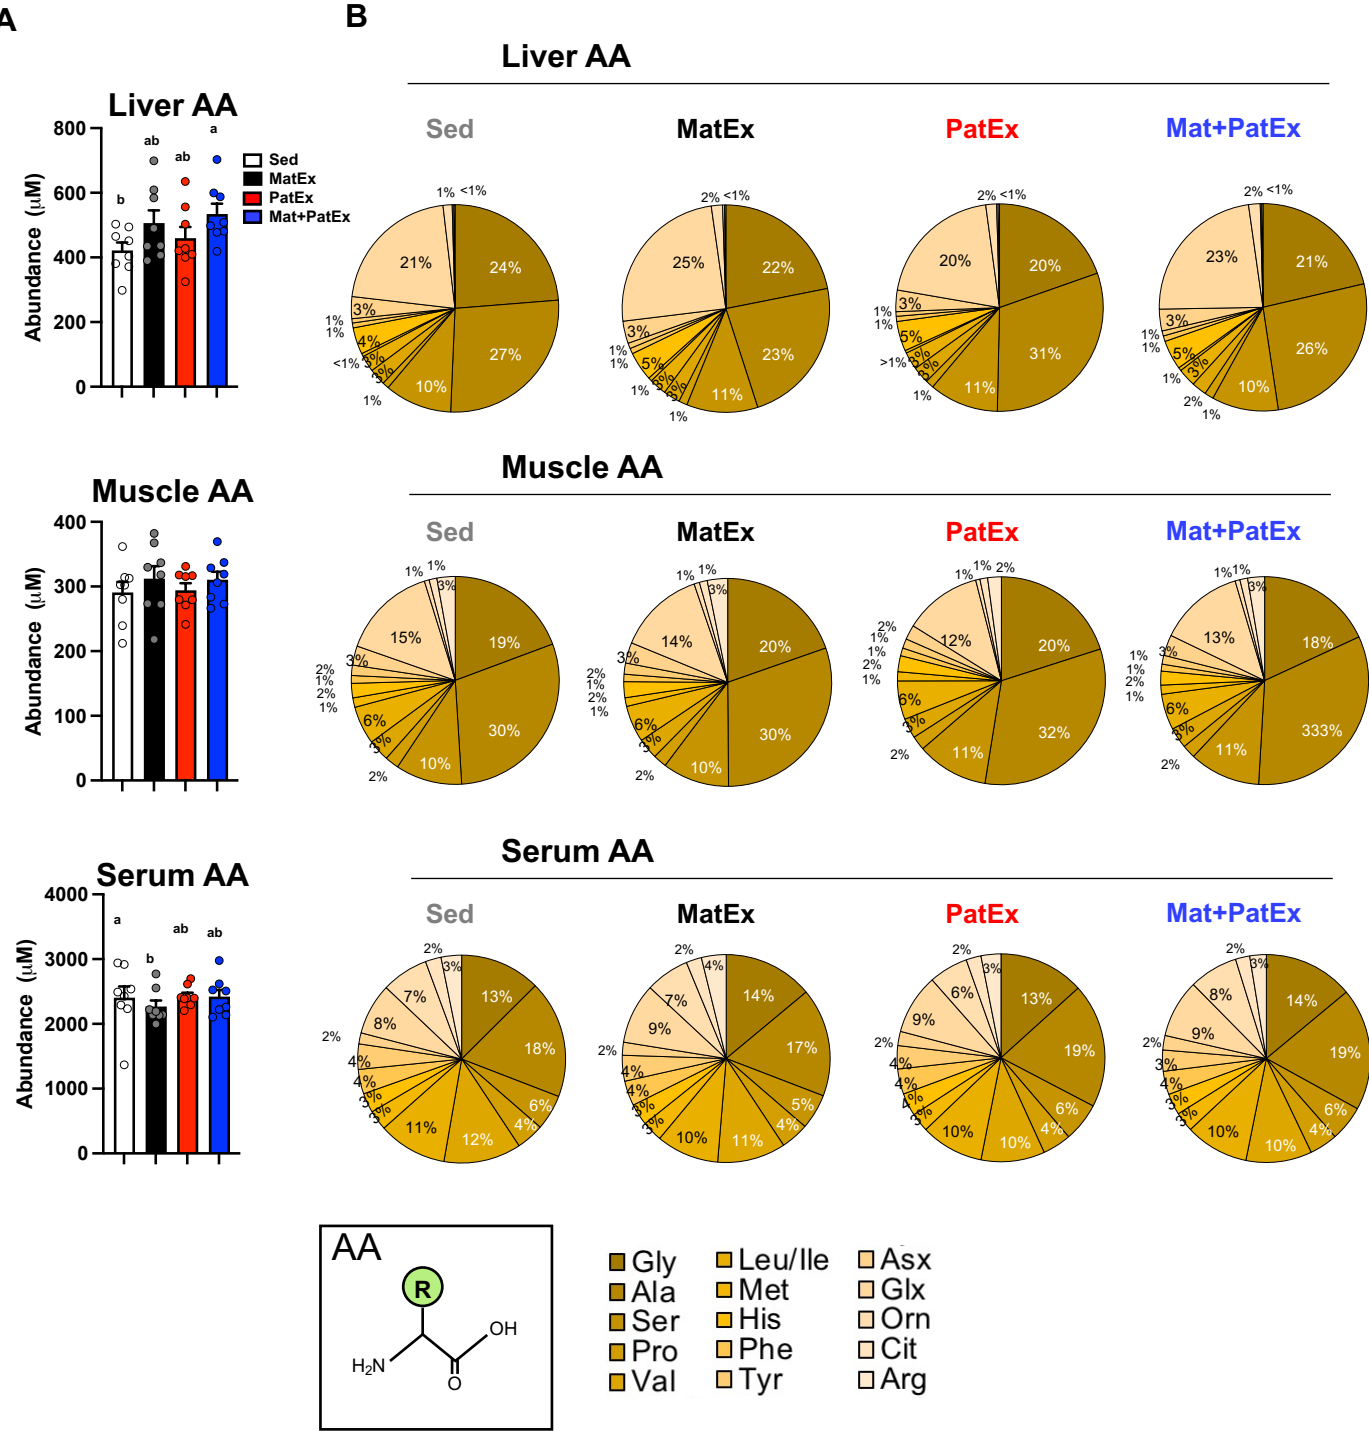

**Suppl. Fig. 1. Amino acid profiles in male offspring.** (A) Amino acid abundance in liver, muscle and serum in male offspring from Sed, MatEx, PatEx, and Mat+PatEx. Abundance is shown as the sum of  $\mu\text{M}$  concentration of AA by tissue. (B) Amino acid composition according to relative concentration in liver, muscle and serum. Amino acid color keys are show at the bottom of the figure. (\*  $p < 0.05$  vs. Sed offspring;  $n = 8/\text{group}$ ).

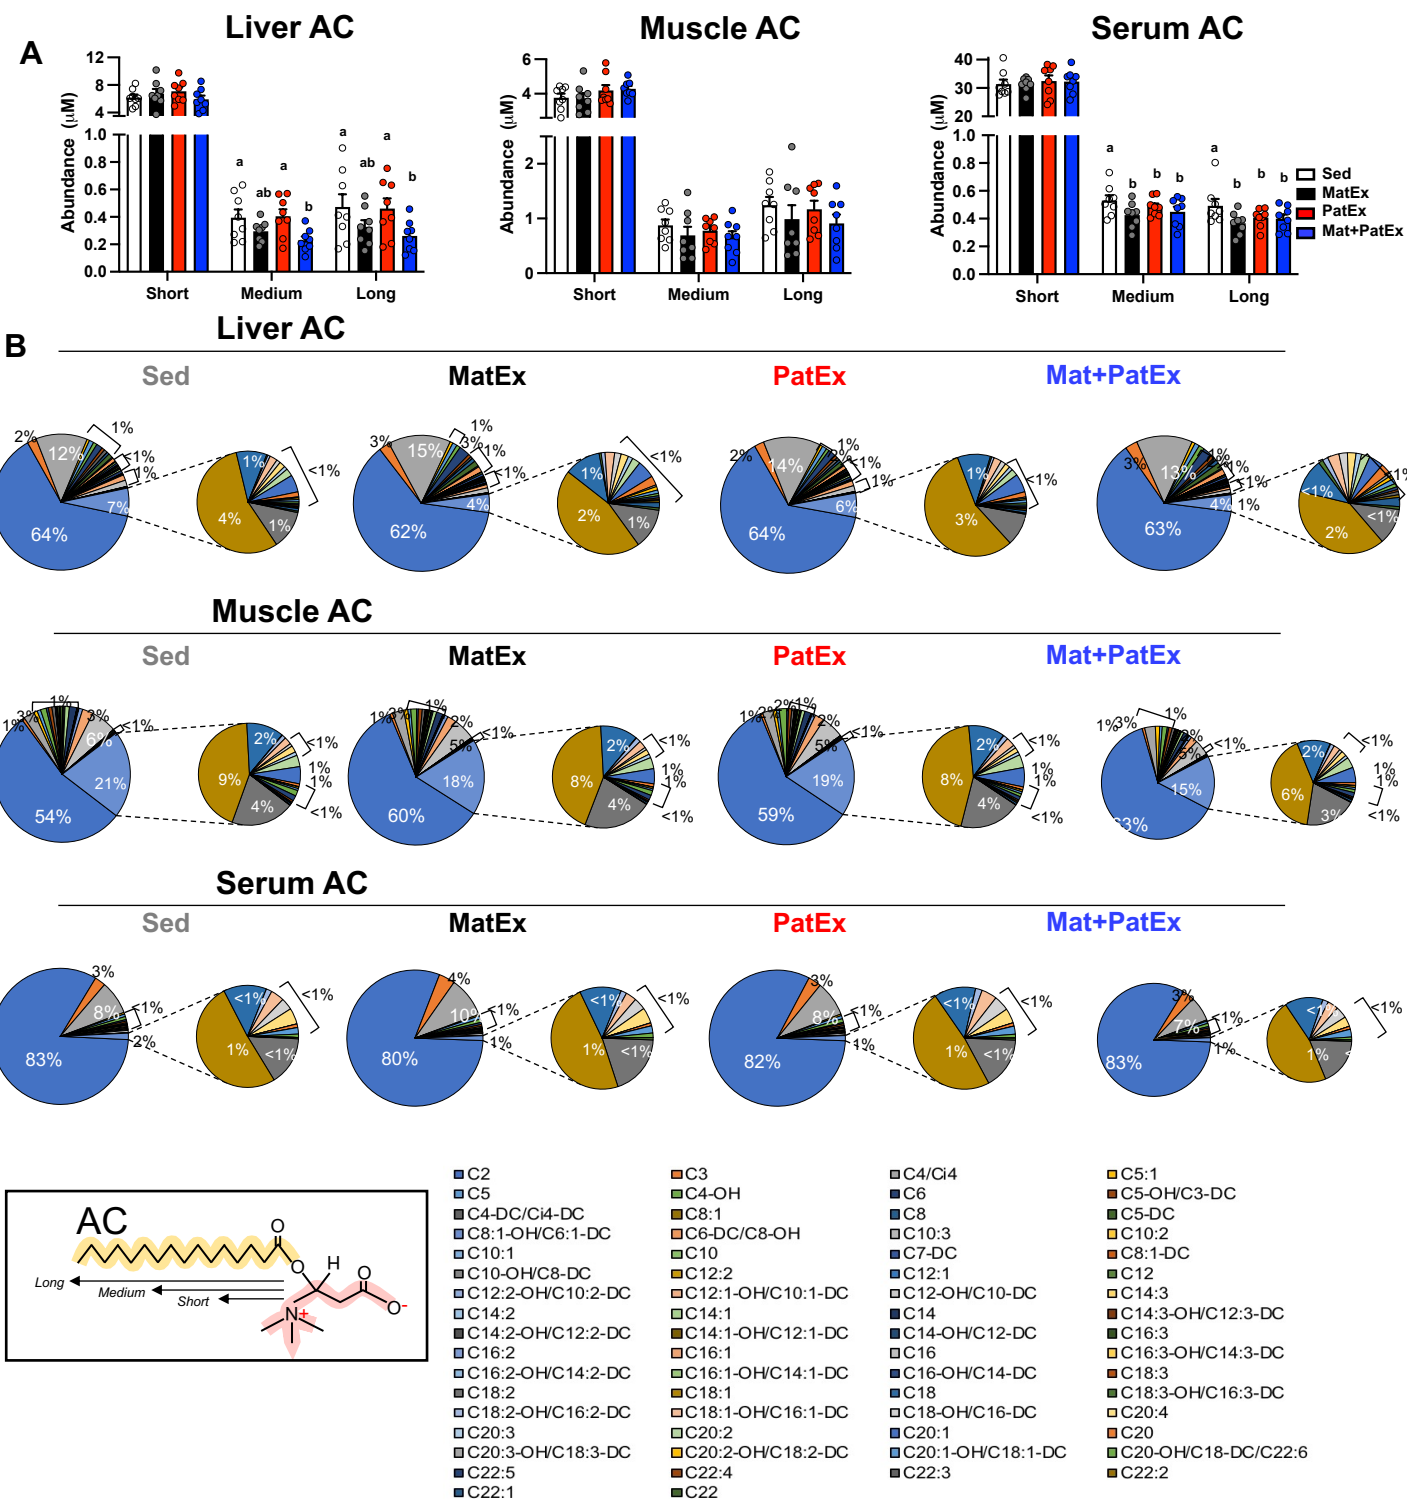

**Suppl. Fig. 2. Acylcarnitine profiles in male offspring.** (A) Short (C2-C10), medium (C12-C16), and long Acylcarnitine (C18-C22) abundance in liver, muscle and serum in male offspring from Sed, MatEx, PatEx, and Mat+PatEx. Abundance is shown as the sum of  $\mu\text{M}$  concentration of acylcarnitines by tissue. (B) Acylcarnitine composition according to relative concentration in liver, muscle and serum for short, medium and long AC. Acylcarnitine color keys are show at the bottom of the figure. (\* $p < 0.05$  vs. Sed offspring;  $n = 8/\text{group}$ ).

Suppl. Fig 3.

A

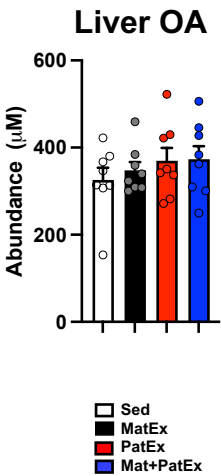

B

Liver OA

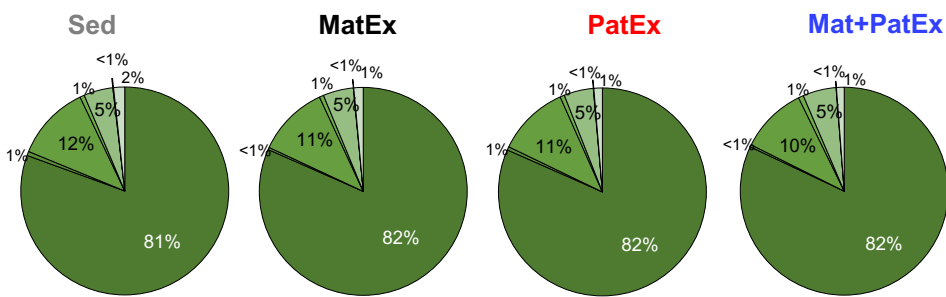

Muscle OA

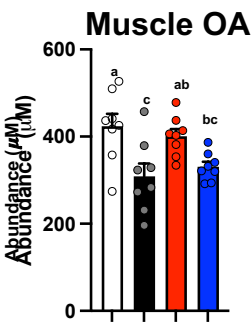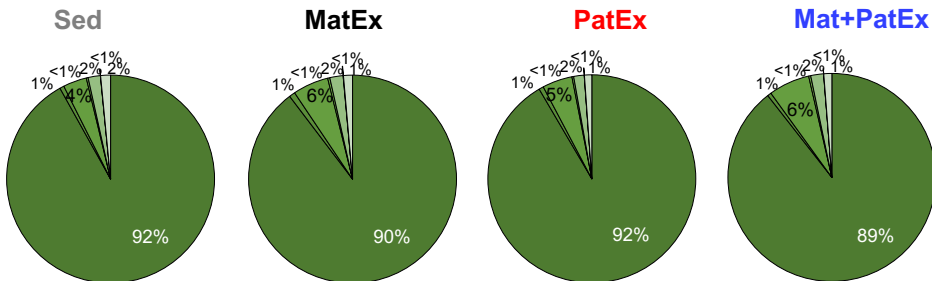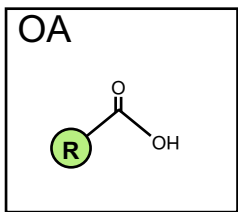

- Lactate
- Pyruvate
- Succinate
- Fumarate
- Malate
- a-Kg
- Citrate

**Suppl. Fig. 3. Organic acid profiles in male offspring.** (A) Organic acid abundance in liver and muscle in male offspring offspring from Sed, MatEx, PatEx, and Mat+PatEx. Abundance is shown as the sum of μM concentration of organic acids. (B) Organic acid composition according to relative concentration in liver and muscle. Organic acid color keys are show on the right side of the figure. (\*p<0.05 vs. Sed offspring; n=8/group).

Suppl. Fig 4.

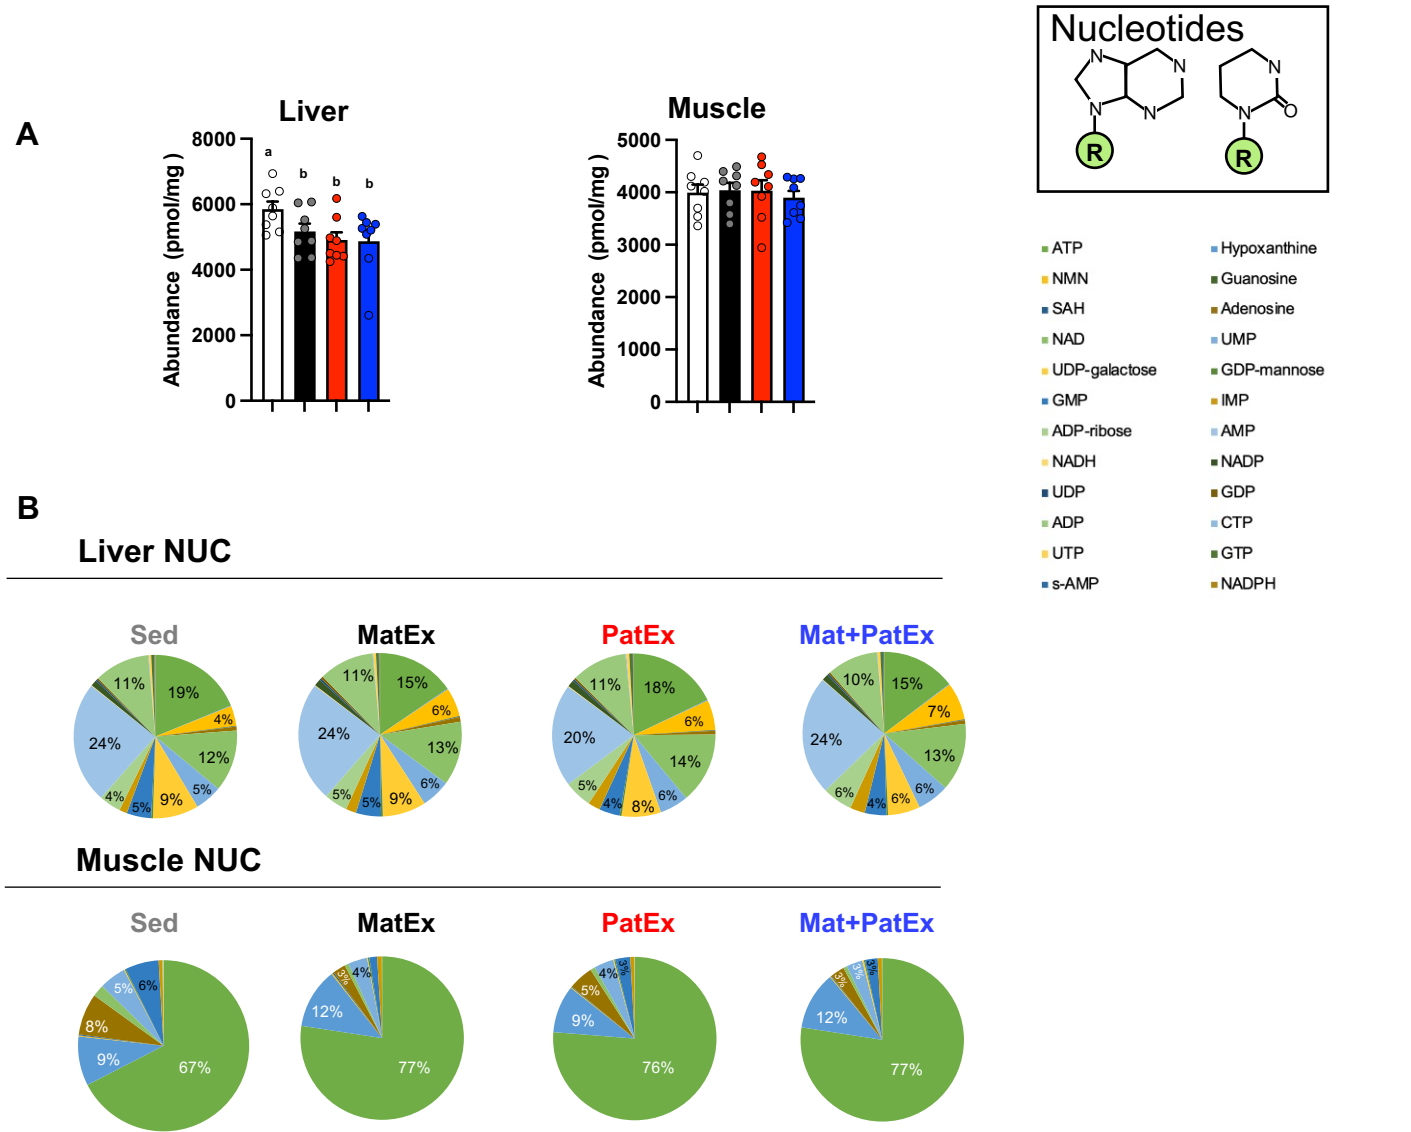

**Suppl. Fig. 4. Nucleotide profiles in male offspring.** (A) Nucleotide abundance in liver and muscle in male offspring from Sed, MatEx, PatEx, and Mat+PatEx. Abundance is shown as the sum of pmol/mg concentration of nucleotides by tissue. (B) Nucleotide composition according to relative concentration in liver and muscle. Nucleotide color keys are show on the right side of the figure. (\*p<0.05 vs. Sed offspring; n=8/group).
